# Supplementary material
Source: PubMed Central journal article supplement (PMC5033896)
Supplement: jciinsight-1-86821-s001.pdf [file jciinsight-1-86821-s001.pdf]

## Supplementary

**Table S1.** Key clinical findings at enzyme replacement therapy start, bortezomib start, and at most recent follow-up at time of database lock for the three patients with infantile Pompe disease.

|                                                               | <b>Patient 1</b>                                                                                                                                                                     | <b>Patient 2</b>                                                                                                                                                                      | <b>Patient 3</b>                                                                                                                                                                                                                                                                        |
|---------------------------------------------------------------|--------------------------------------------------------------------------------------------------------------------------------------------------------------------------------------|---------------------------------------------------------------------------------------------------------------------------------------------------------------------------------------|-----------------------------------------------------------------------------------------------------------------------------------------------------------------------------------------------------------------------------------------------------------------------------------------|
| <b>Respiratory status at ERT start (week 0)</b>               | No respiratory support                                                                                                                                                               | No respiratory support                                                                                                                                                                | Ventilator dependent                                                                                                                                                                                                                                                                    |
| <b>Respiratory status at BTZ start (time since ERT start)</b> | Required ventilation support (PC/PEEP of 15/6 cm H <sub>2</sub> O, breathing rate increased to 30/min) (weeks 86 – 98)                                                               | Required ventilator support (PC/PEEP of 18/8 cm H <sub>2</sub> O, breathing rate 18/min) (week 146)                                                                                   | Increase in ventilatory requirement ; remained on synchronized intermittent mandatory ventilation without a backup breath rate for 1 hour; increased need for tracheostomy suction (weeks 34-88)                                                                                        |
| <b>Follow-up respiratory status (time since ERT start)</b>    | Decrease in ventilation requirement (PC/PEEP of 15/5 cm H <sub>2</sub> O, breathing rate 10/min); ability to come off ventilator frequently for short periods (~8–10 min) (week 159) | Decrease in ventilation requirement (PC/PEEP of 10/5 cm H <sub>2</sub> O, breathing rate 14/min); tolerates trach-mask trials off the ventilator for 10–15 min twice a day (week 221) | Decrease in ventilatory requirements with ability to come off of the ventilator for short periods of time; remains on synchronized intermittent mandatory ventilation without a backup breath rate for the whole day; decreased requirement for tracheostomy suction (weeks 88 onwards) |
| <b>Gross motor status at ERT start (week 0)</b>               | Generalized hypotonia                                                                                                                                                                | Generalized hypotonia                                                                                                                                                                 | Unable to ambulate, sit unsupported                                                                                                                                                                                                                                                     |
| <b>Gross motor status at BTZ start</b>                        | Voluntary motor activity limited to ocular movements only                                                                                                                            | Regression of gross motor milestones;                                                                                                                                                 | Less energy and less exercise tolerance than previously noted; able to stay in a stander                                                                                                                                                                                                |

|                                                              |                                                                                                                                                                                                                                                        |                                                                                                                               |                                                                                                                                       |
|--------------------------------------------------------------|--------------------------------------------------------------------------------------------------------------------------------------------------------------------------------------------------------------------------------------------------------|-------------------------------------------------------------------------------------------------------------------------------|---------------------------------------------------------------------------------------------------------------------------------------|
| <b>(time since ERT start)</b>                                | (weeks 86-98)                                                                                                                                                                                                                                          | remained wheelchair-bound; able to sit with support; unable to stand unassisted (week 146)                                    | for 25 min (week 34 – 88)                                                                                                             |
| <b>Most recent gross motor status (time since ERT start)</b> | Reacquisition of previously lost motor milestones; regained ability to move fingers and toes, bend knees and nod head; recovery of muscles of facial expression and improvement in speech function. Able to operate power wheelchair (week 98 onwards) | Stands with support; increased extremity strength; able to hold arms above body; pushes against resistance (week 200 onwards) | Improved motor control, including holding himself upright while in a stander; able to stay in stander for up to 3 h (week 88 onwards) |
| <b>Feeding status at ERT start (week 0)</b>                  | Oral                                                                                                                                                                                                                                                   | Oral                                                                                                                          | Gastrostomy tube                                                                                                                      |
| <b>Feeding status at BTZ start</b>                           | Gastrostomy tube                                                                                                                                                                                                                                       | Nasogastric tube                                                                                                              | Gastrostomy tube                                                                                                                      |
| <b>Most recent feeding status</b>                            | Gastrostomy tube                                                                                                                                                                                                                                       | Mostly Gastrostomy tube<br>M&M and hotdogs<br>orally                                                                          | Oral with improvement in swallow function plus supplementary gastrostomy tube feeds                                                   |

\* ERT, enzyme replacement therapy; BTZ, Bortezomib; PC, pressure control; PEEP, positive end-expiratory pressure
